# Supplementary material for: Hepcidin mediates transcriptional changes that modulate acute cytokine-induced inflammatory responses in mice
Source: JCI journal article supplement (doi:10.1172/jci42011), 2010-06-08

## **Supplemental Figure Legends**

**Supplemental Figure 1. Transcriptional changes are dependent upon Fpn and occur in peritoneal macrophages.**

**A.** Mouse bone marrow macrophages were transfected with either WT Fpn-GFP or Fpn(D157G)-GFP. Eighteen h later cells were solubilized, RNA extracted and SOCS3, IL-7 and IL-17R mRNA levels were analyzed relative to actin mRNA by RT-PCR. **B.**

Thioglycolate-elicited peritoneal macrophages from C3H mice were isolated, cultured and incubated in presence or absence of FAC (10  $\mu$ M Fe) with or without hepcidin (1  $\mu$ g/ml). Six h later cells were solubilized, RNA extracted and Fpn, SOCS3, IL-7 and IL-17R mRNA levels were analyzed by RT-PCR.

**Supplemental Figure 2. LPS does not induce hepcidin in iron-loaded macrophages.**

**A.** Mouse bone marrow macrophages were incubated +/- FAC (10  $\mu$ M Fe) for 24 h and then incubated for two h +/-LPS (10 ng/ml). Cells were solubilized, RNA extracted and hepcidin and IL-6 mRNA were analyzed relative to actin mRNA by RT-PCR. **B.** Mouse bone marrow macrophages incubated as in A were fixed and CHIP performed with either no antibody or with anti-Stat3 antibody as described in the methods. The data was quantified by densitometry and normalized to actin.

**Supplemental Figure 3. Fpn is down-regulated in the duodenum of mice injected with hepcidin.**

Protein extraction from duodenum of mice injected with or without hepcidin was performed. Fpn levels were analyzed by Western blots using rabbit anti-Fpn followed by a peroxidase-conjugated goat anti-rabbit IgG. Actin was analyzed as a loading control using goat anti-actin followed by a peroxidase-conjugated donkey anti-goat IgG. Fpn levels were quantified by Bio-Rad QuantOne software.

**Supplemental Figure 4. Effect of hepcidin injection on rectal temperature and activity of LPS treated mice.**

**A.** C57BL/6 mice (five for each group) were treated with or without an intraperitoneal injection of hepcidin (100  $\mu$ g/mouse). Two h later, mice were injected with PBS or LPS (1 mg/kg) and four h later rectal temperature was measured. **B.** Mice as in (A) were placed on a Rota-rod that accelerates gradually. The time for the mice to fall from the rod was recorded automatically by digital display (maximum time 300 seconds). Each mouse was given three trials with 15-min intervals between trials.

**Supplemental Figure 5. Effect of a high iron diet on LPS-mediated changes in rectal temperature and activity in wild type and HAMP<sup>-/-</sup> mice.**

**A.** C57BL/6 and HAMP<sup>-/-</sup> mice were maintained on a normal (350 mg iron/kg mouse chow) or high iron (2 g iron/kg mouse chow) diet. After 48 h mice were sacrificed and sera collected. Hepcidin levels in sera were measured using a radioactive competition assay as described<sup>20</sup>. **B.** C57BL/6 and HAMP<sup>-/-</sup> mice maintained on a high iron diet (2 g/kg) for 48 h were treated with an intraperitoneal injection of PBS or LPS as in Supplemental figure 3. Rectal temperature was measured four h later. **C.** Mice as in (B) were placed on top of a Rota-rod that accelerates gradually. The time for the mice to fall from the rod was recorded automatically by digital display (maximum time 300 seconds). Each mouse was given three trials with a 15-min interval between trials.

**Supplemental Figure 6. HFE<sup>-/-</sup> mice show LPS-mediated cytokine responses and hepcidin-mediated transcriptional response.**

**A.** Age and gender matched C57BL/6 and HFE<sup>-/-</sup> mice (five for each group) were intraperitoneally injected with a sublethal (1 mg/kg) dose of LPS. After four h mice were sacrificed and mRNA was extracted from liver. mRNA levels for IL-6 and hepcidin were measured relative to actin mRNA using RT-PCR. **B.** Mouse bone marrow macrophages isolated from WT and HFE<sup>-/-</sup> mice were incubated with FAC (10  $\mu$ M Fe) for 24 h and then incubated in presence of hepcidin (1  $\mu$ g/ml). After two h cells were solubilized, RNA extracted and SOCS3, IL-7 and IL-17R mRNA levels measured relative to actin mRNA using RT-PCR.

**Supplemental Movie 1**

Mice treated as described in Figure 3 were placed in a cage and videotaped for 90 sec. Mice pretreated with hepcidin were marked with an orange tag on the tail. Mice treated with LPS only were marked with a green tag on the tail.

**Supplemental Table 1 Effect of hepcidin on LPS-induced cytokine secretion in macrophages.**

|                       | <b>IL-6 (ng/ml media)</b> | <b>TNF<math>\alpha</math> (ng/ml media)</b> |
|-----------------------|---------------------------|---------------------------------------------|
| <b>-LPS -Hepcidin</b> | 1.4 $\pm$ 0.98            | 1.9 $\pm$ 1.1                               |
| <b>+LPS -Hepcidin</b> | 91.2 $\pm$ 2.69           | 78.3 $\pm$ 3.14                             |
| <b>-LPS +Hepcidin</b> | 1.3 $\pm$ 1.87            | 2.36 $\pm$ 0.87                             |
| <b>+LPS +Hepcidin</b> | 21.0 $\pm$ 2.54           | 18.51 $\pm$ 4.02                            |

Mouse bone marrow macrophages were incubated with FAC (10  $\mu$ M Fe) for 24 h and then incubated for two h in the absence or presence of hepcidin (1  $\mu$ g/ml). After two h +/- hepcidin LPS was added for an additional four h. Media were collected and levels of IL-6 and TNF $\alpha$  were determined by ELISA.

**Supplemental Table 2 Effect of hepcidin on LPS-induced cytokine secretion in vivo.**

|                       | <b>IL-6 (ng/ml serum)</b> | <b>TNF<math>\alpha</math> (ng/ml serum)</b> |
|-----------------------|---------------------------|---------------------------------------------|
| <b>-LPS -Hepcidin</b> | 81 $\pm$ 1.36             | 74 $\pm$ 2.25                               |
| <b>+LPS -Hepcidin</b> | 964 $\pm$ 2.60            | 515 $\pm$ 3.69                              |
| <b>-LPS +Hepcidin</b> | 79 $\pm$ 0.48             | 64 $\pm$ 1.24                               |
| <b>+LPS +Hepcidin</b> | 369 $\pm$ 2.78            | 247 $\pm$ 4.17                              |

Age and gender matched C57BL/6 mice (five for each group) were treated with an intraperitoneal injection of PBS or hepcidin (100  $\mu$ g/mouse). After two h a sublethal dose of LPS (1 mg/kg) was injected intraperitoneally. Sera from these mice were isolated four h post LPS injection and IL-6 (pg/ml serum) and TNF $\alpha$  (pg/ml serum) levels were measured.

**Supplemental Table 3 Effect of a high iron diet on LPS-injected wild type mice.**

|                       | <b>IL-6 (ng/ml serum)</b> | <b>TNF<math>\alpha</math> (ng/ml serum)</b> |
|-----------------------|---------------------------|---------------------------------------------|
| <b>-LPS -Hepcidin</b> | 88 $\pm$ 1.36             | 68 $\pm$ 2.58                               |
| <b>+LPS -Hepcidin</b> | 869 $\pm$ 2.60            | 501 $\pm$ 4.12                              |
| <b>-LPS +Hepcidin</b> | 78 $\pm$ 1.90             | 54 $\pm$ 3.69                               |
| <b>+LPS +Hepcidin</b> | 401 $\pm$ 3.98            | 214 $\pm$ 1.54                              |

Six C57BL/6 mice maintained on a high iron diet for two days were given an intraperitoneal injection of PBS or LPS (1 mg/kg). After four h mice were sacrificed, sera isolated and IL-6 (pg/ml serum) and TNF $\alpha$  (pg/ml serum) levels were measured.

**Supplemental Table 4 Effect of a high iron diet on LPS-injected HAMP<sup>-/-</sup> mice.**

|                       | <b>IL-6 (ng/ml serum)</b> | <b>TNF<math>\alpha</math> (ng/ml serum)</b> |
|-----------------------|---------------------------|---------------------------------------------|
| <b>-LPS -Hepcidin</b> | 132 $\pm$ 3.60            | 96 $\pm$ 1.34                               |
| <b>+LPS -Hepcidin</b> | 1782 $\pm$ 3.60           | 812 $\pm$ 2.46                              |
| <b>-LPS +Hepcidin</b> | 132 $\pm$ 2.1             | 91 $\pm$ 6.70                               |
| <b>+LPS +Hepcidin</b> | 1841 $\pm$ 4.60           | 859 $\pm$ 2.48                              |

Six HAMP<sup>-/-</sup> mice maintained on a high iron diet for two days were given an intraperitoneal injection of PBS or LPS (1 mg/kg). After four h mice were sacrificed, sera isolated and IL-6 (pg/ml serum) and TNF $\alpha$  (pg/ml serum) levels were measured.

**Supplemental Table 5 Primer List**

| <b>Target</b> | <b>Forward</b>            | <b>Reverse</b>        |
|---------------|---------------------------|-----------------------|
| Hepcidin      | agagctgcagcctttgcac       | gaagatgcagatggggaagt  |
| Jak2          | tctgtgggagatctgcagtg      | cacggatgacagctctgaaa  |
| Stat3         | gacccgccaacaaattaaga      | tcgtggtaaactggacacca  |
| IL-7          | gtatttgaccgatgcctgct      | ctgtttctgggcaaattggt  |
| IL-17R        | tgctgtggcactgaagtag       | ttcatggctgcagtgaaaag  |
| TNF $\alpha$  | agccccagctctgtatcctt      | ctcccttgcagaactcagg   |
| SOCS3         | cctttgacaagcggactctc      | gccagcataaaaacccttca  |
| Actin         | gacggccaagtcatcatcactattg | ccacaggattccataccaaga |



# Supplemental Table 6

## Microarray (+Hepcidin 2 hr)

### Cytokine-cytokine receptor interaction

| Ratio | Direction | Gene Identifier | Gene Name                                                                                                                                |
|-------|-----------|-----------------|------------------------------------------------------------------------------------------------------------------------------------------|
| 4.77  | Up        | BC012653        | Mus musculus, Similar to chemokine (C-X3-C) receptor 1, clone MGC:13785 IMAGE:4017224, mRNA, complete cds.                               |
| 3.26  | Down      | NM_009140       | Mus musculus small inducible cytokine subfamily, member 2 (Scyb2), mRNA.                                                                 |
| 3.08  | Up        | D87747          | Mus musculus mRNA for murine CXCR-4, complete cds.                                                                                       |
| 3.04  | Down      | BG976607        | ectodermal-neural cortex 1                                                                                                               |
| 2.94  | Down      | NM_009971       | Mus musculus colony stimulating factor 3 (granulocyte) (Csf3), mRNA.                                                                     |
| 2.77  | Up        | AI573431        | Mus musculus interleukin 7 receptor (Il7r), mRNA.<br>interleukin 7 receptor /FL=gb:NM_008372.2 gb:M29697.1                               |
| 2.71  | Up        | AI573431        | gb:AF078906.1                                                                                                                            |
| 2.7   | Up        | BC012653        | Mus musculus chemokine (C-X3-C) receptor 1 (Cx3cr1), mRNA.                                                                               |
| 2.69  | Down      | NM_031168       | Mus musculus interleukin 6 (Il6), mRNA.                                                                                                  |
| 2.44  | Down      | NM_008176       | Mus musculus GRO1 oncogene (Gro1), mRNA.                                                                                                 |
| 2.26  | Down      | BB554288        | ESTs                                                                                                                                     |
| 2.22  | Up        | NM_010228       | Mus musculus FMS-like tyrosine kinase 1 (Flt1), mRNA.                                                                                    |
| 2.16  | Down      | U50712          | Mus musculus monocyte chemoattractant protein-5 precursor (MCP-5) mRNA, complete cds.                                                    |
| 2.14  | Up        | AF252873        | Mus musculus CXC chemokine MIP-2gamma precursor, mRNA, complete cds.                                                                     |
| 2.12  | Down      | BC011437        | Mus musculus, Similar to interleukin 1 beta, clone MGC:18555 IMAGE:3989461, mRNA, complete cds.                                          |
| 1.99  | Down      | AV246615        | expressed sequence AW061234                                                                                                              |
| 1.99  | Down      | X03019          | Mouse mRNA for granulocyte-macrophage colony stimulating factor (GM-CSF).                                                                |
| 1.94  | Down      | NM_008518       | Mus musculus lymphotoxin B (Ltb), mRNA.                                                                                                  |
| 1.84  | Down      | BB554288        | ESTs                                                                                                                                     |
| 1.8   | Down      | NM_013653       | Mus musculus small inducible cytokine A5 (Scya5), mRNA.<br>transforming growth factor, beta receptor I /FL=gb:D28526.1                   |
| 1.74  | Up        | BM248342        | gb:NM_009370.1 gb:D25540.1                                                                                                               |
| 1.73  | Down      | AV239587        | bone morphogenetic protein 2 /FL=gb:NM_007553.1                                                                                          |
| 1.62  | Up        | BG972377        | tumor necrosis factor receptor superfamily, member 21 /FL=gb:AF322069.1 gb:AY043489.1 gb:NM_052975.1 gb:BC016420.1                       |
| 1.62  | Down      | NM_013693       | Mus musculus tumor necrosis factor (Tnf), mRNA.                                                                                          |
| 1.62  | Down      | AF128218        | Mus musculus strain B10.SJ small inducible cytokine A4 (ScyA4) mRNA, complete cds.                                                       |
| 1.58  | Up        | BC023427        | Mus musculus platelet derived growth factor, B polypeptide (Pdgfb), mRNA.                                                                |
| 1.58  | Up        | AK010040        | Mus musculus adult male tongue cDNA, RIKEN full-length enriched library, clone:2310065C03:interleukin 17 receptor, full insert sequence. |
| 1.57  | Up        | BG972377        | Mus musculus tumor necrosis factor receptor superfamily, member 21 (Tnfrsf21), mRNA.                                                     |
| 1.56  | Up        | AK010040        | Mus musculus interleukin 17 receptor (Il17r), mRNA.                                                                                      |
| 1.55  | Down      | NM_007782       | Mus musculus colony stimulating factor 3 receptor (granulocyte) (Csf3r), mRNA.                                                           |
| 1.55  | Up        | AV231648        | Mus musculus, chemokine (C-C) receptor 1, clone MGC:18743 IMAGE:3992755, mRNA, complete cds.                                             |
| 1.54  | Up        | BB815530        | kit ligand /FL=gb:U44725.1 gb:NM_013598.1 gb:BC011322.1                                                                                  |

|      |    |          |                                                                                                                 |
|------|----|----------|-----------------------------------------------------------------------------------------------------------------|
|      |    |          | gb:M57647.1                                                                                                     |
| 1.51 | Up | BC023427 | Mus musculus, Similar to platelet derived growth factor, B polypeptide, clone IMAGE:5010396, mRNA, partial cds. |

### Cell adhesion molecules (CAMs)

| Ratio | Direction | Gene Identifier | Gene Name                                                                                                                                                                                                                                                                  |
|-------|-----------|-----------------|----------------------------------------------------------------------------------------------------------------------------------------------------------------------------------------------------------------------------------------------------------------------------|
| 3.98  | Down      | M36005          | Mus musculus selectin, lymphocyte (Sell), mRNA.                                                                                                                                                                                                                            |
| 3.17  | Down      | M36005          | Mouse lymph node homing receptor mRNA, complete cds.                                                                                                                                                                                                                       |
| 2.88  | Up        | NM_009864       | Mus musculus cadherin 1 (Cdh1), mRNA.                                                                                                                                                                                                                                      |
| 2.04  | Up        | BB350308        | ESTs                                                                                                                                                                                                                                                                       |
| 1.97  | Up        | NM_133983       | Mus musculus expressed sequence AU016588 (AU016588), mRNA.                                                                                                                                                                                                                 |
| 1.89  | Up        | NM_013486       | Mus musculus CD2 antigen (Cd2), mRNA.                                                                                                                                                                                                                                      |
| 1.78  | Up        | NM_018770       | immunoglobulin superfamily, member 4 /FL=gb:NM_018770.1<br>gb:AF061260.1 gb:AB021965.1 gb:AB021964.1 gb:AB052293.1<br>gb:AF434663.1<br>immunoglobulin superfamily, member 4 /FL=gb:NM_018770.1<br>gb:AF061260.1 gb:AB021965.1 gb:AB021964.1 gb:AB052293.1<br>gb:AF434663.1 |
| 1.76  | Up        | NM_018770       |                                                                                                                                                                                                                                                                            |
| 1.75  | Up        | BG144448        | ESTs                                                                                                                                                                                                                                                                       |
| 1.73  | Up        | NM_018770       | Mus musculus immunoglobulin superfamily, member 4 (Igsf4), mRNA.                                                                                                                                                                                                           |
| 1.73  | Down      | BQ175493        | expressed sequence AI447669                                                                                                                                                                                                                                                |
| 1.69  | Down      | BB623587        | Mus musculus integrin alpha8 mRNA, partial cds<br>Mus musculus adult male hippocampus cDNA, RIKEN full-length<br>enriched library, clone:2900073G06:immunoglobulin superfamily,<br>member 4, full insert sequence.                                                         |
| 1.67  | Up        | AK013775        |                                                                                                                                                                                                                                                                            |
| 1.66  | Down      | NM_009259       | Mus musculus sialophorin (Spn), mRNA.                                                                                                                                                                                                                                      |
| 1.62  | Up        | NM_010386       | Mus musculus histocompatibility 2, class II, locus DMa (H2-DMa),<br>mRNA.                                                                                                                                                                                                  |
| 1.62  | Down      | NM_008984       | Mus musculus protein tyrosine phosphatase, receptor-type, M (Ptpm),<br>mRNA.                                                                                                                                                                                               |
| 1.61  | Up        | NM_010388       | Mus musculus histocompatibility 2, class II, locus Mb2 (H2-DMb2),<br>mRNA.                                                                                                                                                                                                 |
| 1.58  | Down      | NM_019388       | Mus musculus, CD86 antigen, clone MGC:18471 IMAGE:4008635,<br>mRNA, complete cds.                                                                                                                                                                                          |
| 1.57  | Down      | NM_133721       | RIKEN cDNA 2610002H11 gene /FL=gb:NM_133721.1                                                                                                                                                                                                                              |
| 1.57  | Up        | AU021035        | Mus musculus syndecan 2 (Sdc2), mRNA.                                                                                                                                                                                                                                      |
| 1.55  | Up        | AF349453        | Mus musculus claudin-18A2.2 mRNA, complete cds, alternatively<br>spliced.                                                                                                                                                                                                  |
| 1.53  | Up        | NM_007727       | Mus musculus contactin 1 (Cntn1), mRNA.                                                                                                                                                                                                                                    |
| 1.51  | Down      | BM251152        | chondroitin sulfate proteoglycan 2                                                                                                                                                                                                                                         |

### MAPK signaling pathway

| Ratio | Direction | Gene Identifier | Gene Name                                                                                                                        |
|-------|-----------|-----------------|----------------------------------------------------------------------------------------------------------------------------------|
| 3.04  | Down      | BG976607        | ectodermal-neural cortex 1                                                                                                       |
| 2.18  | Down      | BE691393        | expressed sequence AI452260                                                                                                      |
| 2.16  | Up        | AV295798        | RIKEN cDNA 2310076D10 gene<br>Mus musculus, Similar to interleukin 1 beta, clone MGC:18555<br>IMAGE:3989461, mRNA, complete cds. |
| 2.12  | Down      | BC011437        |                                                                                                                                  |
| 2.09  | Up        | NM_012044       | Mus musculus phospholipase A2, group IIE (Pla2g2e), mRNA.                                                                        |

|      |      |           |                                                                                                                                                    |
|------|------|-----------|----------------------------------------------------------------------------------------------------------------------------------------------------|
| 1.83 | Up   | BQ266161  | ESTs                                                                                                                                               |
| 1.82 | Down | X59274    | M.musculus mRNA brain protein kinase C beta-I.                                                                                                     |
| 1.78 | Up   | NM_025846 | Mus musculus related RAS viral (r-ras) oncogene homolog 2 (Ras2), mRNA.                                                                            |
| 1.78 | Down | NM_013642 | Mus musculus protein tyrosine phosphatase, non-receptor type 16 (Ptpn16), mRNA.                                                                    |
| 1.75 | Down | BF660388  | protein kinase C, beta /FL=gb:NM_008855.1                                                                                                          |
| 1.74 | Up   | BM248342  | transforming growth factor, beta receptor I /FL=gb:D28526.1<br>gb:NM_009370.1 gb:D25540.1                                                          |
| 1.69 | Up   | AK012530  | Mus musculus 11 days embryo whole body cDNA, RIKEN full-length enriched library, clone:2700078F24:unclassifiable transcript, full insert sequence. |
| 1.68 | Down | NM_020013 | Mus musculus fibroblast growth factor 21 (Fgf21), mRNA.                                                                                            |
| 1.66 | Down | BB121278  | DNA segment, Chr 6, ERATO Doi 213, expressed                                                                                                       |
| 1.62 | Down | NM_013693 | Mus musculus tumor necrosis factor (Tnf), mRNA.                                                                                                    |
| 1.62 | Down | NM_009008 | Mus musculus RAS-related C3 botulinum substrate 2 (Rac2), mRNA.                                                                                    |
| 1.58 | Up   | BC023427  | Mus musculus platelet derived growth factor, B polypeptide (Pdgfb), mRNA.                                                                          |
| 1.56 | Down | NM_011949 | Mus musculus mitogen activated protein kinase 1 (Mapk1), mRNA.                                                                                     |
| 1.52 | Up   | BB821318  | expressed sequence AW124339                                                                                                                        |
| 1.52 | Down | AK018008  | Mus musculus adult male thymus cDNA, RIKEN full-length enriched library, clone:5830453M24:unclassifiable transcript, full insert sequence.         |
| 1.52 | Up   | BB147462  | expressed sequence AI848108                                                                                                                        |
| 1.51 | Up   | BC023427  | Mus musculus, Similar to platelet derived growth factor, B polypeptide, clone IMAGE:5010396, mRNA, partial cds.                                    |
| 1.5  | Up   | AV295798  | RIKEN cDNA 2310076D10 gene                                                                                                                         |

### Focal adhesion

| Ratio | Direction | Gene Identifier | Gene Name                                                                                                                         |
|-------|-----------|-----------------|-----------------------------------------------------------------------------------------------------------------------------------|
| 4.3   | Up        | AB029929        | Mus musculus mRNA for caveolin-1 alfa isoform, complete cds.                                                                      |
| 3.05  | Up        | NM_010580       | Mus musculus integrin beta 5 (Itgb5), mRNA.                                                                                       |
| 2.83  | Up        | NM_010580       | Mus musculus integrin beta 5 (Itgb5), mRNA.                                                                                       |
| 2.72  | Up        | BB543979        | integrin beta 5                                                                                                                   |
| 2.32  | Down      | AK007904        | Mus musculus 10 day old male pancreas cDNA, RIKEN full-length enriched library, clone:1810059D21:cyclin D2, full insert sequence. |
| 2.27  | Down      | NM_009829       | cyclin D2 /FL=gb:M86182.1 gb:M83749.1 gb:NM_009829.1                                                                              |
| 2.22  | Up        | NM_010228       | Mus musculus FMS-like tyrosine kinase 1 (Flt1), mRNA.                                                                             |
| 2.18  | Down      | BE691393        | expressed sequence AI452260                                                                                                       |
| 2.11  | Down      | NM_009829       | Mus musculus cyclin D2 (Cnd2), mRNA.                                                                                              |
| 2.02  | Down      | NM_009829       | cyclin D2 /FL=gb:M86182.1 gb:M83749.1 gb:NM_009829.1                                                                              |
| 1.94  | Up        | BI134907        | catenin beta                                                                                                                      |
| 1.94  | Down      | NM_009829       | cyclin D2 /FL=gb:M86182.1 gb:M83749.1 gb:NM_009829.1                                                                              |
| 1.89  | Down      | BQ175880        | EST AA087124                                                                                                                      |
| 1.82  | Down      | X59274          | M.musculus mRNA brain protein kinase C beta-I.                                                                                    |
| 1.75  | Down      | BF660388        | protein kinase C, beta /FL=gb:NM_008855.1                                                                                         |
| 1.73  | Down      | BQ175493        | expressed sequence AI447669                                                                                                       |
| 1.72  | Up        | BB667216        | expressed sequence AI551257                                                                                                       |
| 1.7   | Up        | NM_007614       | Mus musculus catenin beta (Catnb), mRNA.                                                                                          |
| 1.69  | Down      | BB623587        | Mus musculus integrin alpha8 mRNA, partial cds                                                                                    |
| 1.62  | Down      | NM_009008       | Mus musculus RAS-related C3 botulinum substrate 2 (Rac2), mRNA.                                                                   |

|      |      |           |                                                                                                                 |
|------|------|-----------|-----------------------------------------------------------------------------------------------------------------|
| 1.58 | Up   | BC023427  | Mus musculus platelet derived growth factor, B polypeptide (Pdgfb), mRNA.                                       |
| 1.57 | Down | NM_133721 | RIKEN cDNA 2610002H11 gene /FL=gb:NM_133721.1                                                                   |
| 1.57 | Up   | BI134721  | expressed sequence AI595373                                                                                     |
| 1.56 | Down | NM_011949 | Mus musculus mitogen activated protein kinase 1 (Mapk1), mRNA.                                                  |
| 1.55 | Up   | AI465173  | expressed sequence AI465173                                                                                     |
| 1.53 | Down | AI385532  | thrombospondin 1 /FL=gb:M87276.1 gb:NM_011580.1                                                                 |
| 1.51 | Down | BF451748  | Mus musculus telokin mRNA, complete cds /FL=gb:AF314149.1                                                       |
| 1.51 | Up   | BC023427  | Mus musculus, Similar to platelet derived growth factor, B polypeptide, clone IMAGE:5010396, mRNA, partial cds. |

### Regulation of actin cytoskeleton

| Ratio | Direction | Gene Identifier | Gene Name                                                                                                                          |
|-------|-----------|-----------------|------------------------------------------------------------------------------------------------------------------------------------|
| 3.05  | Up        | NM_010580       | Mus musculus integrin beta 5 (Itgb5), mRNA.                                                                                        |
| 2.83  | Up        | NM_010580       | Mus musculus integrin beta 5 (Itgb5), mRNA.                                                                                        |
| 2.72  | Up        | BB543979        | integrin beta 5                                                                                                                    |
| 2.27  | Up        | AW492237        | expressed sequence AI132431                                                                                                        |
| 2.23  | Up        | NM_019410       | Mus musculus profilin 2 (Pfn2), mRNA.                                                                                              |
| 2.18  | Down      | BE691393        | expressed sequence AI452260                                                                                                        |
| 1.93  | Down      | BC003763        | Mus musculus, Similar to phosphatidylinositol-4-phosphate 5-kinase, type 1 beta, clone MGC:5928 IMAGE:3591003, mRNA, complete cds. |
| 1.78  | Up        | NM_025846       | Mus musculus related RAS viral (r-ras) oncogene homolog 2 (Rras2), mRNA.                                                           |
| 1.73  | Down      | BQ175493        | expressed sequence AI447669                                                                                                        |
| 1.69  | Down      | BB623587        | Mus musculus integrin alpha8 mRNA, partial cds                                                                                     |
| 1.68  | Down      | NM_020013       | Mus musculus fibroblast growth factor 21 (Fgf21), mRNA.                                                                            |
| 1.67  | Down      | BB822856        | phosphatidylinositol-4-phosphate 5-kinase, type 1 beta                                                                             |
| 1.62  | Down      | NM_009008       | Mus musculus RAS-related C3 botulinum substrate 2 (Rac2), mRNA.                                                                    |
| 1.59  | Down      | BQ176159        | RIKEN cDNA 5730504C04 gene                                                                                                         |
| 1.59  | Up        | NM_019410       | Mus musculus profilin 2 (Pfn2), mRNA.                                                                                              |
| 1.58  | Up        | BC023427        | Mus musculus platelet derived growth factor, B polypeptide (Pdgfb), mRNA.                                                          |
| 1.57  | Down      | NM_133721       | RIKEN cDNA 2610002H11 gene /FL=gb:NM_133721.1                                                                                      |
| 1.56  | Down      | NM_011949       | Mus musculus mitogen activated protein kinase 1 (Mapk1), mRNA.                                                                     |
| 1.52  | Up        | BB469215        | ESTs                                                                                                                               |
| 1.51  | Down      | BF451748        | Mus musculus telokin mRNA, complete cds /FL=gb:AF314149.1                                                                          |
| 1.51  | Up        | BC023427        | Mus musculus, Similar to platelet derived growth factor, B polypeptide, clone IMAGE:5010396, mRNA, partial cds.                    |

### Hematopoietic cell lineage

| Ratio | Direction | Gene Identifier | Gene Name                                                            |
|-------|-----------|-----------------|----------------------------------------------------------------------|
| 3.56  | Up        | NM_009846       | Mus musculus CD24a antigen (Cd24a), mRNA.                            |
| 2.94  | Down      | NM_009971       | Mus musculus colony stimulating factor 3 (granulocyte) (Csf3), mRNA. |
| 2.85  | Up        | NM_009846       | CD24a antigen /FL=gb:NM_009846.1 gb:M58661.1                         |
| 2.77  | Up        | AI573431        | Mus musculus interleukin 7 receptor (Il7r), mRNA.                    |
| 2.71  | Up        | AI573431        | interleukin 7 receptor /FL=gb:NM_008372.2 gb:M29697.1 gb:AF078906.1  |
| 2.69  | Down      | NM_031168       | Mus musculus interleukin 6 (Il6), mRNA.                              |

|      |      |           |                                                                                                                                   |
|------|------|-----------|-----------------------------------------------------------------------------------------------------------------------------------|
| 2.12 | Down | BC011437  | Mus musculus, Similar to interleukin 1 beta, clone MGC:18555 IMAGE:3989461, mRNA, complete cds.                                   |
| 2.11 | Down | BE686894  | ESTs                                                                                                                              |
| 2.03 | Down | NM_007646 | Mus musculus CD38 antigen (Cd38), mRNA.<br>Mouse mRNA for granulocyte-macrophage colony stimulating factor (GM-CSF).              |
| 1.99 | Down | X03019    |                                                                                                                                   |
| 1.89 | Up   | NM_013486 | Mus musculus CD2 antigen (Cd2), mRNA.                                                                                             |
| 1.7  | Down | NM_010016 | Mus musculus decay accelerating factor 1 (Daf1), mRNA.                                                                            |
| 1.62 | Down | NM_013693 | Mus musculus tumor necrosis factor (Tnf), mRNA.<br>Mus musculus colony stimulating factor 3 receptor (granulocyte) (Csf3r), mRNA. |
| 1.55 | Down | NM_007782 |                                                                                                                                   |
| 1.54 | Up   | BB815530  | kit ligand /FL=gb:U44725.1 gb:NM_013598.1 gb:BC011322.1 gb:M57647.1                                                               |
| 1.51 | Down | NM_010016 | decay accelerating factor 1 /FL=gb:NM_010016.1 gb:L41366.1 gb:BC011314.1 gb:D63679.1                                              |

### Neuroactive ligand-receptor interaction

| Ratio | Direction | Gene Identifier | Gene Name                                                                                                                                          |
|-------|-----------|-----------------|----------------------------------------------------------------------------------------------------------------------------------------------------|
| 7.36  | Up        | NM_008311       | Mus musculus 5-hydroxytryptamine (serotonin) receptor 2B (Htr2b), mRNA.                                                                            |
| 1.95  | Down      | BF100813        | expressed sequence AU022549                                                                                                                        |
| 1.83  | Down      | D43775          | Mouse mRNA for endothelin-1, complete cds.                                                                                                         |
| 1.79  | Up        | AW490413        | ESTs                                                                                                                                               |
| 1.71  | Down      | AF209905        | Mus musculus calcitonin receptor-like receptor mRNA, complete cds.                                                                                 |
| 1.69  | Down      | NM_007577       | Mus musculus complement component 5, receptor 1 (C5r1), mRNA.                                                                                      |
| 1.68  | Up        | AW558570        | ESTs                                                                                                                                               |
| 1.63  | Down      | NM_008039       | Mus musculus formyl peptide receptor, related sequence 2 (Fpr-rs2), mRNA.                                                                          |
| 1.59  | Down      | BB552085        | ESTs                                                                                                                                               |
| 1.54  | Down      | AV083350        | ESTs, Highly similar to BETA-2 ADRENERGIC RECEPTOR (M.musculus)                                                                                    |
| 1.52  | Up        | BB133079        | endothelial differentiation sphingolipid G-protein-coupled receptor 1 /FL=gb:NM_007901.1                                                           |
| 1.51  | Down      | AV344554        | ESTs                                                                                                                                               |
| 1.5   | Up        | AK003144        | Mus musculus 18 days embryo whole body cDNA, RIKEN full-length enriched library, clone:1100001A16:unclassifiable transcript, full insert sequence. |

### Calcium signaling pathway

| Ratio | Direction | Gene Identifier | Gene Name                                                                                                 |
|-------|-----------|-----------------|-----------------------------------------------------------------------------------------------------------|
| 7.36  | Up        | NM_008311       | Mus musculus 5-hydroxytryptamine (serotonin) receptor 2B (Htr2b), mRNA.                                   |
| 2.03  | Down      | NM_007646       | Mus musculus CD38 antigen (Cd38), mRNA.                                                                   |
| 1.95  | Down      | BF100813        | expressed sequence AU022549                                                                               |
| 1.94  | Up        | BB224034        | Mus musculus strain ILS phospholipase C beta 4 (Plcb4) mRNA, complete cds /FL=gb:AF332071.1 gb:AF332072.1 |
| 1.82  | Down      | X59274          | M.musculus mRNA brain protein kinase C beta-I.                                                            |
| 1.79  | Up        | AW490413        | ESTs                                                                                                      |
| 1.75  | Down      | BF660388        | protein kinase C, beta /FL=gb:NM_008855.1                                                                 |

|      |      |           |                                                                                                         |
|------|------|-----------|---------------------------------------------------------------------------------------------------------|
| 1.68 | Up   | AW558570  | ESTs                                                                                                    |
| 1.57 | Up   | BB313689  | expressed sequence AI852629                                                                             |
| 1.56 | Down | NM_016745 | Mus musculus, ATPase, Ca++ transporting, ubiquitous, clone MGC:28920 IMAGE:4924519, mRNA, complete cds. |
| 1.54 | Down | AV083350  | ESTs, Highly similar to BETA-2 ADRENERGIC RECEPTOR (M.musculus)                                         |
| 1.51 | Down | BF451748  | Mus musculus telokin mRNA, complete cds /FL=gb:AF314149.1                                               |

### Complement and coagulation cascades

| Ratio | Direction | Gene Identifier | Gene Name                                                                                                                                                 |
|-------|-----------|-----------------|-----------------------------------------------------------------------------------------------------------------------------------------------------------|
| 3.2   | Down      | NM_007976       | coagulation factor V /FL=gb:NM_007976.1 gb:U52925.1                                                                                                       |
| 2.89  | Up        | NM_008871       | Mus musculus serine (or cysteine) proteinase inhibitor, clade E (nexin, plasminogen activator inhibitor type 1), member 1 (Serpine1), mRNA.               |
| 2.43  | Down      | K02782          | Mouse complement component C3 mRNA, alpha and beta subunits, complete cds.                                                                                |
| 2.14  | Down      | NM_007976       | Mus musculus coagulation factor V (F5), mRNA.                                                                                                             |
| 2.11  | Down      | BE686894        | ESTs                                                                                                                                                      |
| 1.72  | Up        | BB667216        | expressed sequence AI551257                                                                                                                               |
| 1.7   | Down      | NM_010016       | Mus musculus decay accelerating factor 1 (Daf1), mRNA.                                                                                                    |
| 1.69  | Down      | NM_007577       | Mus musculus complement component 5, receptor 1 (C5r1), mRNA.                                                                                             |
| 1.64  | Up        | NM_007572       | Mus musculus complement component 1, q subcomponent, alpha polypeptide (C1qa), mRNA.                                                                      |
| 1.6   | Up        | NM_009378       | Mus musculus thrombomodulin (Thbd), mRNA.                                                                                                                 |
| 1.6   | Up        | AK015095        | Mus musculus adult male testis cDNA, RIKEN full-length enriched library, clone:4930405E17:Zinc carboxypeptidase containing protein, full insert sequence. |
| 1.59  | Down      | BB552085        | ESTs                                                                                                                                                      |
| 1.58  | Up        | NM_007574       | Mus musculus complement component 1, q subcomponent, c polypeptide (C1qc), mRNA.                                                                          |
| 1.51  | Down      | NM_010016       | decay accelerating factor 1 /FL=gb:NM_010016.1 gb:L41366.1 gb:BC011314.1 gb:D63679.1                                                                      |

### Jak-STAT signaling pathway

| Ratio | Direction | Gene Identifier | Gene Name                                                                                                                         |
|-------|-----------|-----------------|-----------------------------------------------------------------------------------------------------------------------------------|
| 2.94  | Down      | NM_009971       | Mus musculus colony stimulating factor 3 (granulocyte) (Csf3), mRNA.                                                              |
| 2.77  | Up        | AI573431        | Mus musculus interleukin 7 receptor (Il7r), mRNA.                                                                                 |
| 2.71  | Up        | AI573431        | interleukin 7 receptor /FL=gb:NM_008372.2 gb:M29697.1 gb:AF078906.1                                                               |
| 2.69  | Down      | NM_031168       | Mus musculus interleukin 6 (Il6), mRNA.                                                                                           |
| 2.48  | Down      | NM_011487       | Mus musculus signal transducer and activator of transcription 4 (Stat4), mRNA.                                                    |
| 2.32  | Down      | AK007904        | Mus musculus 10 day old male pancreas cDNA, RIKEN full-length enriched library, clone:1810059D21:cyclin D2, full insert sequence. |
| 2.27  | Down      | NM_009829       | cyclin D2 /FL=gb:M86182.1 gb:M83749.1 gb:NM_009829.1                                                                              |
| 2.11  | Down      | NM_009829       | Mus musculus cyclin D2 (Ccmd2), mRNA.                                                                                             |
| 2.02  | Down      | NM_009829       | cyclin D2 /FL=gb:M86182.1 gb:M83749.1 gb:NM_009829.1                                                                              |
| 1.99  | Down      | AV246615        | expressed sequence AW061234                                                                                                       |
| 1.99  | Down      | X03019          | Mouse mRNA for granulocyte-macrophage colony stimulating factor (GM-CSF).                                                         |

|      |      |           |                                                                                |
|------|------|-----------|--------------------------------------------------------------------------------|
| 1.94 | Down | NM_009829 | cyclin D2 /FL=gb:M86182.1 gb:M83749.1 gb:NM_009829.1                           |
| 1.89 | Down | BQ175880  | EST AA087124                                                                   |
| 1.8  | Up   | NM_007707 | Mus musculus cytokine inducible SH2-containing protein 3 (Cish3), mRNA.        |
| 1.56 | Up   | NM_007706 | Mus musculus cytokine inducible SH2-containing protein 2 (Cish2), mRNA.        |
| 1.55 | Down | NM_007782 | Mus musculus colony stimulating factor 3 receptor (granulocyte) (Csf3r), mRNA. |

### Melanogenesis

| Ratio | Direction | Gene Identifier | Gene Name                                                                                                              |
|-------|-----------|-----------------|------------------------------------------------------------------------------------------------------------------------|
| 2.47  | Down      | NM_009526       | Mus musculus wingless-related MMTV integration site 6 (Wnt6), mRNA.                                                    |
| 2.11  | Down      | AV308073        | ESTs                                                                                                                   |
| 1.95  | Down      | BF100813        | expressed sequence AU022549                                                                                            |
| 1.94  | Up        | BB224034        | Mus musculus strain ILS phospholipase C beta 4 (Plcb4) mRNA, complete cds /FL=gb:AF332071.1 gb:AF332072.1              |
| 1.94  | Up        | BI134907        | catenin beta                                                                                                           |
| 1.83  | Down      | D43775          | Mouse mRNA for endothelin-1, complete cds.                                                                             |
| 1.82  | Down      | X59274          | M.musculus mRNA brain protein kinase C beta-I.                                                                         |
| 1.75  | Down      | BF660388        | protein kinase C, beta /FL=gb:NM_008855.1                                                                              |
| 1.7   | Up        | NM_007614       | Mus musculus catenin beta (Catnb), mRNA.                                                                               |
| 1.61  | Up        | BB175494        | transcription factor 4                                                                                                 |
| 1.56  | Down      | NM_011949       | Mus musculus mitogen activated protein kinase 1 (Mapk1), mRNA. kit ligand /FL=gb:U44725.1 gb:NM_013598.1 gb:BC011322.1 |
| 1.54  | Up        | BB815530        | gb:M57647.1                                                                                                            |
| 1.51  | Up        | BB175494        | transcription factor 4                                                                                                 |

### Adherens junction

| Ratio | Direction | Gene Identifier | Gene Name                                                                              |
|-------|-----------|-----------------|----------------------------------------------------------------------------------------|
| 2.88  | Up        | NM_009864       | Mus musculus cadherin 1 (Cdh1), mRNA.                                                  |
| 2.18  | Down      | BE691393        | expressed sequence AI452260                                                            |
| 1.94  | Up        | BI134907        | catenin beta                                                                           |
| 1.74  | Up        | BM248342        | transforming growth factor, beta receptor I /FL=gb:D28526.1 gb:NM_009370.1 gb:D25540.1 |
| 1.7   | Up        | NM_007614       | Mus musculus catenin beta (Catnb), mRNA.                                               |
| 1.62  | Down      | NM_009008       | Mus musculus RAS-related C3 botulinum substrate 2 (Rac2), mRNA.                        |
| 1.62  | Down      | NM_008984       | Mus musculus protein tyrosine phosphatase, receptor-type, M (Ptpm), mRNA.              |
| 1.61  | Up        | BB175494        | transcription factor 4                                                                 |
| 1.56  | Down      | NM_011949       | Mus musculus mitogen activated protein kinase 1 (Mapk1), mRNA.                         |
| 1.55  | Up        | AI465173        | expressed sequence AI465173                                                            |
| 1.51  | Up        | BB175494        | transcription factor 4                                                                 |

### Axon guidance

| Ratio | Direction | Gene Identifier | Gene Name |
|-------|-----------|-----------------|-----------|
|-------|-----------|-----------------|-----------|

|      |      |           |                                                                                                                     |
|------|------|-----------|---------------------------------------------------------------------------------------------------------------------|
| 3.17 | Down | AV348197  | ESTs                                                                                                                |
| 3.08 | Up   | D87747    | Mus musculus mRNA for murine CXCR-4, complete cds.                                                                  |
| 2.49 | Down | Z93948    | M.musculus mRNA for semaphorin Hv (3988 bp).                                                                        |
| 2.18 | Down | BE691393  | expressed sequence AI452260<br>ESTs, Weakly similar to TRANSFORMING PROTEIN RHOB (M.musculus)                       |
| 2.17 | Down | BE852181  | Mus musculus sema domain, immunoglobulin domain (Ig), short basic domain, secreted, (semaphorin) 3E (Sema3e), mRNA. |
| 2.04 | Down | NM_011348 | ESTs                                                                                                                |
| 1.68 | Down | BB361326  | ESTs                                                                                                                |
| 1.62 | Down | NM_009008 | Mus musculus RAS-related C3 botulinum substrate 2 (Rac2), mRNA.                                                     |
| 1.56 | Down | BQ032843  | expressed sequence AI426163                                                                                         |
| 1.56 | Down | NM_011949 | Mus musculus mitogen activated protein kinase 1 (Mapk1), mRNA.                                                      |
| 1.54 | Down | AI606937  | ESTs                                                                                                                |

### PPAR signaling pathway

| Ratio | Direction | Gene Identifier | Gene Name                                                                                                                                                                               |
|-------|-----------|-----------------|-----------------------------------------------------------------------------------------------------------------------------------------------------------------------------------------|
| 2.8   | Up        | NM_010174       | Mus musculus fatty acid binding protein 3, muscle and heart (Fabp3), mRNA.                                                                                                              |
| 2.5   | Up        | NM_138648       | Mus musculus oxidized low density lipoprotein (lectin-like) receptor 1 (Olr1), mRNA.                                                                                                    |
| 2.45  | Down      | AK017272        | Mus musculus 6 days neonate head cDNA, RIKEN full-length enriched library, clone:5430405H20:lipoprotein lipase, full insert sequence.                                                   |
| 2.14  | Down      | BC003305        | Mus musculus lipoprotein lipase (Lpl), mRNA.                                                                                                                                            |
| 2.09  | Up        | NM_021272       | Mus musculus fatty acid binding protein 7, brain (Fabp7), mRNA.                                                                                                                         |
| 1.78  | Down      | BF683028        | glycerol kinase /FL=gb:U48403.1 gb:Nm_008194.1 gb:BC003767.1                                                                                                                            |
| 1.78  | Down      | BF683028        | Mus musculus glycerol kinase (Gyk), mRNA.                                                                                                                                               |
| 1.62  | Down      | AI591480        | protective protein for beta-galactosidase<br>Mus musculus adult male testis cDNA, RIKEN full-length enriched library, clone:1700026H15:malic enzyme, supernatant, full insert sequence. |
| 1.6   | Up        | AK006387        | Mus musculus RIKEN cDNA 1300013A03 gene (1300013A03Rik), mRNA.                                                                                                                          |
| 1.6   | Down      | NM_024264       | mRNA.                                                                                                                                                                                   |
| 1.52  | Up        | BC011081        | Mus musculus malic enzyme, supernatant (Mod1), mRNA.                                                                                                                                    |
| 1.52  | Down      | BQ176629        | ESTs                                                                                                                                                                                    |

### Purine metabolism

| Ratio | Direction | Gene Identifier | Gene Name                                                                                                             |
|-------|-----------|-----------------|-----------------------------------------------------------------------------------------------------------------------|
| 1.81  | Up        | NM_007421       | Mus musculus adenylosuccinate synthetase 1, muscle (Adss1), mRNA.                                                     |
| 1.74  | Down      | AF055573        | Mus musculus fragile histidine triad protein (Fhit) mRNA, complete cds.                                               |
| 1.72  | Up        | AF339910        | Mus musculus ectonucleotide pyrophosphatasephosphodiesterase 1 allotype b (Enpp1) mRNA, Enpp1-b allele, complete cds. |
| 1.69  | Down      | BM246564        | phosphodiesterase 4B, cAMP specific /FL=gb:Nm_019840.1 gb:AF326556.1 gb:AF326555.1 gb:AF208023.2                      |
| 1.59  | Up        | NM_021515       | Mus musculus adenylate kinase 1 (Ak1), mRNA.                                                                          |
| 1.59  | Down      | BG793493        | ESTs                                                                                                                  |
| 1.58  | Up        | AW910504        | RIKEN cDNA 4833416E15 gene                                                                                            |
| 1.56  | Up        | NM_009647       | Mus musculus adenylate kinase 4 (Ak4), mRNA.                                                                          |
| 1.53  | Down      | BB729239        | RNA polymerase 1-4 (194 kDa subunit) /FL=gb:Nm_009088.1 gb:AF000938.1                                                 |



|      |      |           |                                              |
|------|------|-----------|----------------------------------------------|
| 1.51 | Up   | NM_009647 | Mus musculus adenylate kinase 4 (Ak4), mRNA. |
| 1.5  | Down | NM_010266 | Mus musculus guanine deaminase (Gda), mRNA.  |

### TGF-beta signaling pathway

| Ratio | Direction | Gene Identifier | Gene Name                                                                                             |
|-------|-----------|-----------------|-------------------------------------------------------------------------------------------------------|
| 1.98  | Up        | AF010133        | Mus musculus Smad6 mRNA, complete cds.<br>transforming growth factor, beta receptor I /FL=gb:D28526.1 |
| 1.74  | Up        | BM248342        | gb:Nm_009370.1 gb:D25540.1                                                                            |
| 1.73  | Down      | AV239587        | bone morphogenetic protein 2 /FL=gb:Nm_007553.1                                                       |
| 1.64  | Up        | U43884          | Mus musculus transcription factor Id1B (Id1B) mRNA, complete cds.                                     |
| 1.62  | Down      | NM_013693       | Mus musculus tumor necrosis factor (Tnf), mRNA.                                                       |
| 1.56  | Down      | NM_011949       | Mus musculus mitogen activated protein kinase 1 (Mapk1), mRNA.                                        |
| 1.54  | Up        | NM_008321       | Mus musculus inhibitor of DNA binding 3 (Idb3), mRNA.                                                 |
| 1.53  | Down      | AI385532        | thrombospondin 1 /FL=gb:M87276.1 gb:Nm_011580.1                                                       |

### Wnt signaling pathway

| Ratio | Direction | Gene Identifier | Gene Name                                                                                                                         |
|-------|-----------|-----------------|-----------------------------------------------------------------------------------------------------------------------------------|
| 2.47  | Down      | NM_009526       | Mus musculus wingless-related MMTV integration site 6 (Wnt6), mRNA.                                                               |
| 2.32  | Down      | AK007904        | Mus musculus 10 day old male pancreas cDNA, RIKEN full-length enriched library, clone:1810059D21:cyclin D2, full insert sequence. |
| 2.27  | Down      | NM_009829       | cyclin D2 /FL=gb:M86182.1 gb:M83749.1 gb:Nm_009829.1                                                                              |
| 2.18  | Down      | BE691393        | expressed sequence AI452260                                                                                                       |
| 2.11  | Down      | AV308073        | ESTs                                                                                                                              |
| 2.11  | Down      | NM_009829       | Mus musculus cyclin D2 (Cnd2), mRNA.                                                                                              |
| 2.02  | Down      | NM_009829       | cyclin D2 /FL=gb:M86182.1 gb:M83749.1 gb:Nm_009829.1                                                                              |
| 1.94  | Up        | BB224034        | Mus musculus strain ILS phospholipase C beta 4 (Plcb4) mRNA, complete cds /FL=gb:AF332071.1 gb:AF332072.1                         |
| 1.94  | Up        | BI134907        | catenin beta                                                                                                                      |
| 1.94  | Down      | NM_009829       | cyclin D2 /FL=gb:M86182.1 gb:M83749.1 gb:Nm_009829.1                                                                              |
| 1.89  | Down      | BQ175880        | EST AA087124                                                                                                                      |
| 1.82  | Down      | X59274          | M.musculus mRNA brain protein kinase C beta-I.                                                                                    |
| 1.75  | Down      | BF660388        | protein kinase C, beta /FL=gb:Nm_008855.1                                                                                         |
| 1.7   | Up        | NM_007614       | Mus musculus catenin beta (Catnb), mRNA.                                                                                          |
| 1.62  | Down      | NM_009008       | Mus musculus RAS-related C3 botulinum substrate 2 (Rac2), mRNA.                                                                   |
| 1.61  | Up        | BB175494        | transcription factor 4                                                                                                            |
| 1.54  | Down      | U34245          | Mus musculus fos-related antigen-1 (Fra-1) mRNA, complete cds.                                                                    |
| 1.51  | Up        | BB175494        | transcription factor 4                                                                                                            |

### Arachidonic acid metabolism

| Ratio | Direction | Gene Identifier | Gene Name                                                                                                                                                             |
|-------|-----------|-----------------|-----------------------------------------------------------------------------------------------------------------------------------------------------------------------|
| 3.59  | Down      | M94967          | Mouse glucocorticoid-regulated inflammatory prostaglandin GH synthase (griPGHS) mRNA, complete cds.<br>Mus musculus RIKEN cDNA 1810054N16 gene (1810054N16Rik), mRNA. |
| 2.48  | Up        | NM_024444       |                                                                                                                                                                       |
| 2.09  | Up        | NM_012044       | Mus musculus phospholipase A2, group IIE (Pla2g2e), mRNA.                                                                                                             |

|      |      |           |                                                                                                   |
|------|------|-----------|---------------------------------------------------------------------------------------------------|
| 1.71 | Up   | BC010758  | Mus musculus, Similar to carbonyl reductase 2, clone MGC:18465 IMAGE:4219349, mRNA, complete cds. |
| 1.71 | Down | NM_022415 | Mus musculus prostaglandin E synthase (Ptges), mRNA.                                              |
| 1.62 | Down | BB730139  | ESTs                                                                                              |
| 1.57 | Up   | NM_011539 | Mus musculus thromboxane A synthase 1, platelet (Tbxas1), mRNA.                                   |
| 1.55 | Up   | NM_009998 | Mus musculus cytochrome P450, 2b10, phenobarbital inducible, type b (Cyp2b10), mRNA.              |
| 1.54 | Down | NM_022415 | Mus musculus, prostaglandin E synthase, clone MGC:35838 IMAGE:4950950, mRNA, complete cds.        |

### ECM-receptor interaction

| Ratio | Direction | Gene Identifier | Gene Name                                                                                                                                                                                                                                                     |
|-------|-----------|-----------------|---------------------------------------------------------------------------------------------------------------------------------------------------------------------------------------------------------------------------------------------------------------|
| 3.05  | Up        | NM_010580       | Mus musculus integrin beta 5 (Itgb5), mRNA.                                                                                                                                                                                                                   |
| 2.83  | Up        | NM_010580       | Mus musculus integrin beta 5 (Itgb5), mRNA.                                                                                                                                                                                                                   |
| 2.72  | Up        | BB543979        | integrin beta 5                                                                                                                                                                                                                                               |
| 1.73  | Down      | BQ175493        | expressed sequence AI447669                                                                                                                                                                                                                                   |
| 1.72  | Up        | BB667216        | expressed sequence AI551257                                                                                                                                                                                                                                   |
| 1.69  | Down      | BB623587        | Mus musculus integrin alpha8 mRNA, partial cds                                                                                                                                                                                                                |
| 1.57  | Down      | NM_133721       | RIKEN cDNA 2610002H11 gene /FL=gb:NM_133721.1                                                                                                                                                                                                                 |
| 1.57  | Up        | AU021035        | Mus musculus syndecan 2 (Sdc2), mRNA.                                                                                                                                                                                                                         |
| 1.53  | Down      | AI385532        | thrombospondin 1 /FL=gb:M87276.1 gb:NM_011580.1<br>Mus musculus 12 days embryo male wolffian duct includes surrounding region cDNA, RIKEN full-length enriched library, clone:6720466F14:hyaluronan mediated motility receptor (RHAMM), full insert sequence. |
| 1.52  | Up        | AK020144        |                                                                                                                                                                                                                                                               |
| 1.51  | Up        | AF079222        | Mus musculus hyaluronan receptor RHAMMV5 mRNA, complete cds.                                                                                                                                                                                                  |

### Leukocyte transendothelial migration

| Ratio | Direction | Gene Identifier | Gene Name                                                                                           |
|-------|-----------|-----------------|-----------------------------------------------------------------------------------------------------|
| 7.29  | Down      | NM_013599       | Mouse mRNA for gelatinase, complete cds.                                                            |
| 4.65  | Down      | NM_013599       | Mus musculus matrix metalloproteinase 9 (Mmp9), mRNA.                                               |
| 3.08  | Up        | D87747          | Mus musculus mRNA for murine CXCR-4, complete cds.                                                  |
| 2.18  | Down      | BE691393        | expressed sequence AI452260<br>Mus musculus CXC chemokine MIP-2gamma precursor, mRNA, complete cds. |
| 2.14  | Up        | AF252873        |                                                                                                     |
| 1.94  | Up        | BI134907        | catenin beta                                                                                        |
| 1.82  | Down      | X59274          | M.musculus mRNA brain protein kinase C beta-I.                                                      |
| 1.75  | Down      | BF660388        | protein kinase C, beta /FL=gb:NM_008855.1                                                           |
| 1.7   | Up        | NM_007614       | Mus musculus catenin beta (Catnb), mRNA.                                                            |
| 1.62  | Down      | NM_009008       | Mus musculus RAS-related C3 botulinum substrate 2 (Rac2), mRNA.                                     |
| 1.55  | Up        | AF349453        | Mus musculus claudin-18A2.2 mRNA, complete cds, alternatively spliced.                              |

### Toll-like receptor interaction

| Ratio | Direction | Gene Identifier | Gene Name                               |
|-------|-----------|-----------------|-----------------------------------------|
| 2.69  | Down      | NM_031168       | Mus musculus interleukin 6 (Il6), mRNA. |

|      |      |           |                                                                                                    |
|------|------|-----------|----------------------------------------------------------------------------------------------------|
| 2.12 | Down | BC011437  | Mus musculus, Similar to interleukin 1 beta, clone MGC:18555<br>IMAGE:3989461, mRNA, complete cds. |
| 1.8  | Down | NM_013653 | Mus musculus small inducible cytokine A5 (Scya5), mRNA.                                            |
| 1.62 | Down | NM_013693 | Mus musculus tumor necrosis factor (Tnf), mRNA.                                                    |
| 1.62 | Down | AF128218  | Mus musculus strain B10.SJ small inducible cytokine A4 (ScyA4)<br>mRNA, complete cds.              |
| 1.58 | Down | NM_019388 | Mus musculus, CD86 antigen, clone MGC:18471 IMAGE:4008635,<br>mRNA, complete cds.                  |
| 1.52 | Up   | BB821318  | expressed sequence AW124339                                                                        |
| 1.52 | Up   | BB147462  | expressed sequence AI848108                                                                        |

# Supplemental Figure 1

**A**

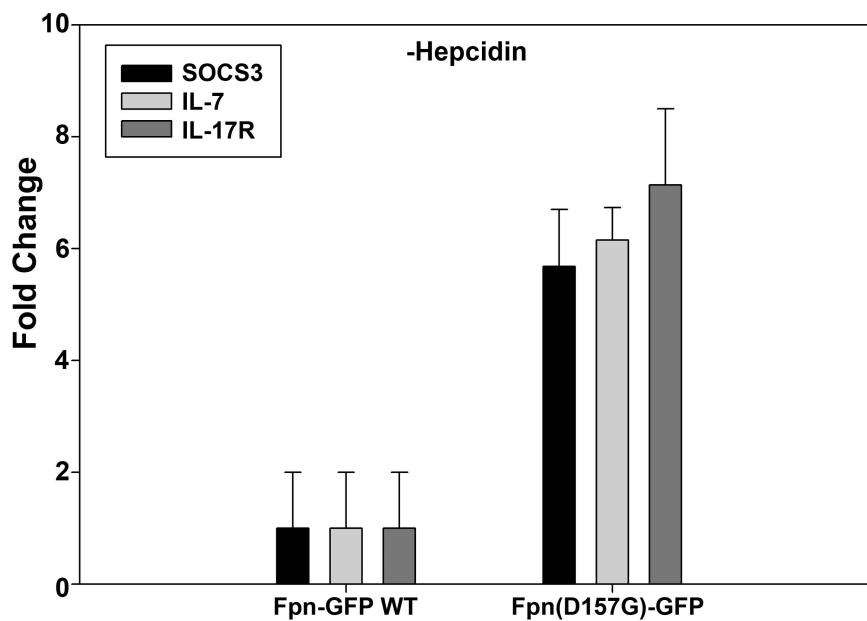

**B**

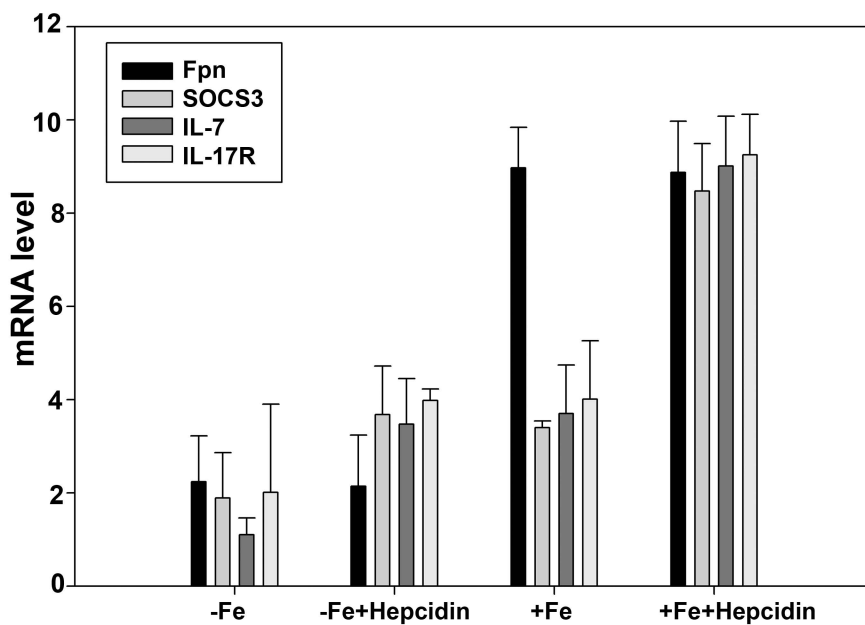

# Supplemental Figure 2

**A**

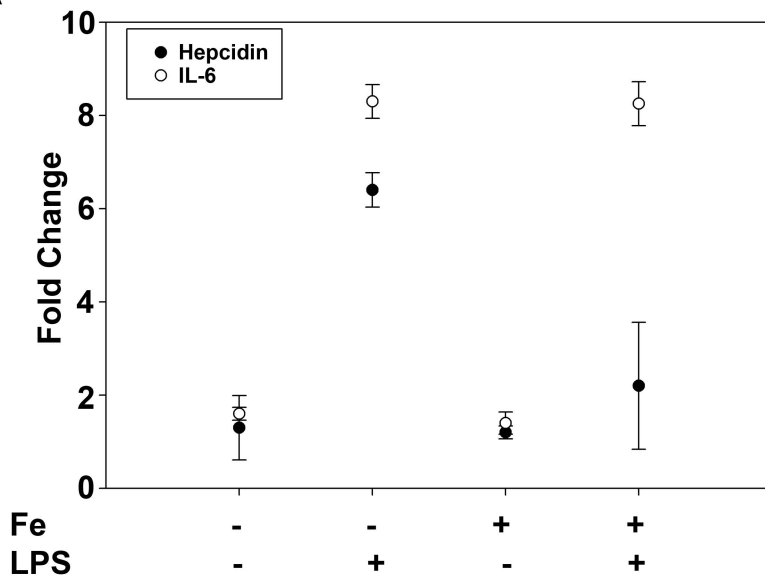

**B**

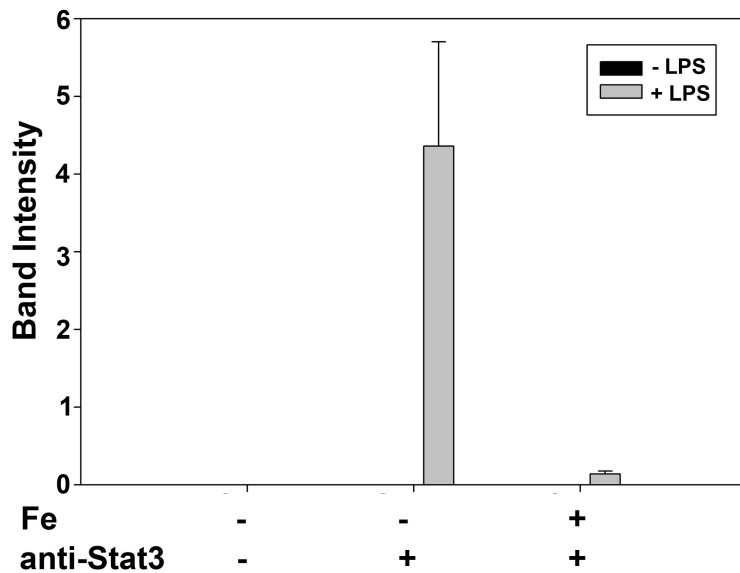

# Supplemental Figure 3

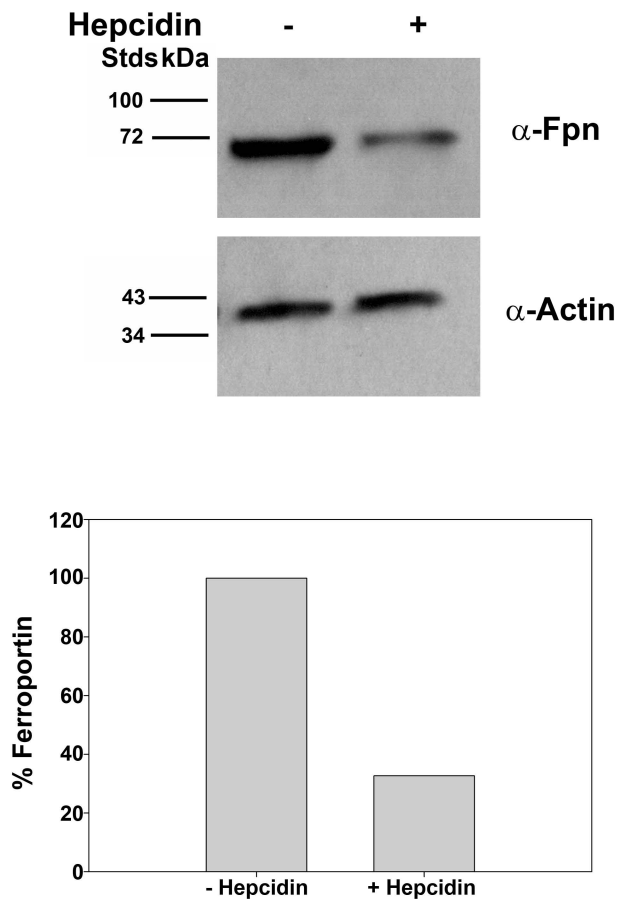

# Supplemental Figure 4

**A**

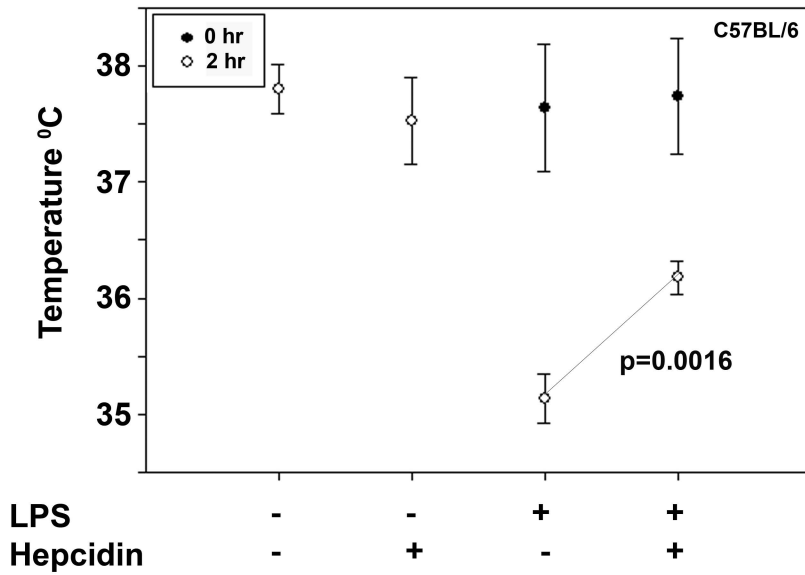

**B**

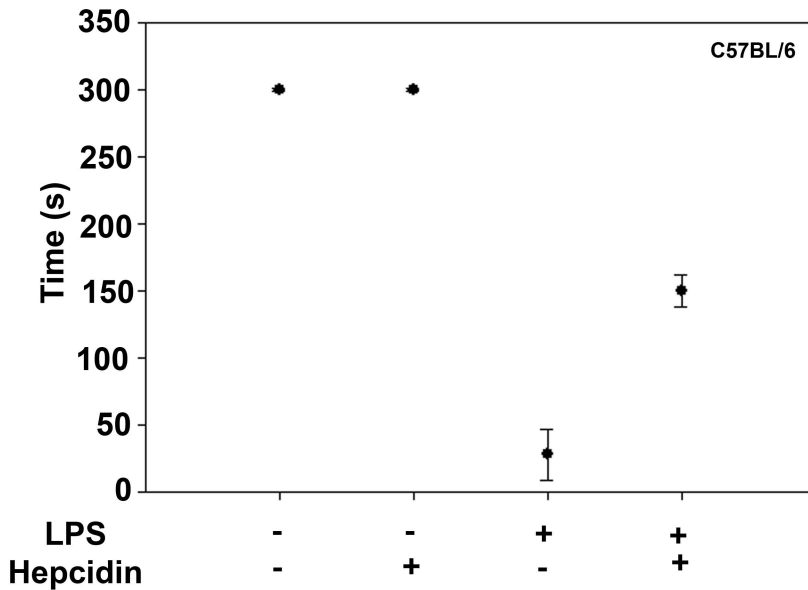

# Supplemental Figure 5

**A**

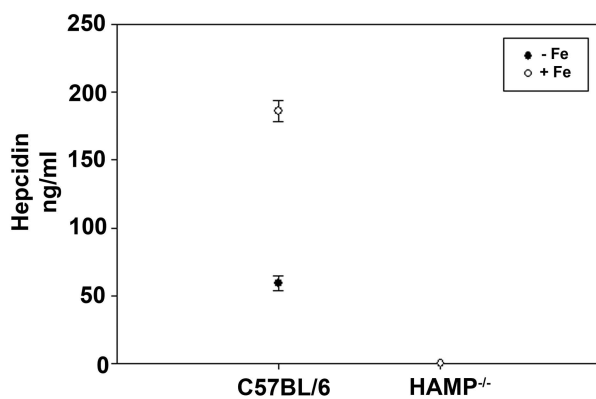

**B**

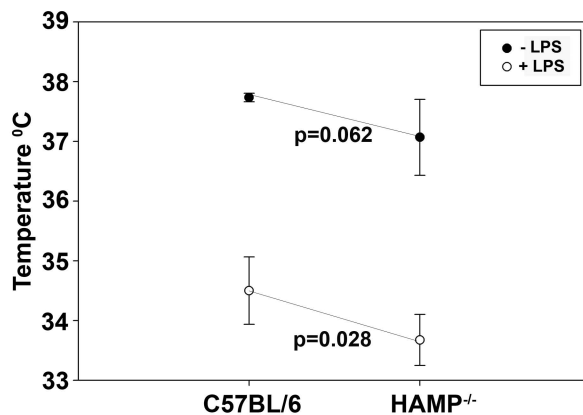

**C**

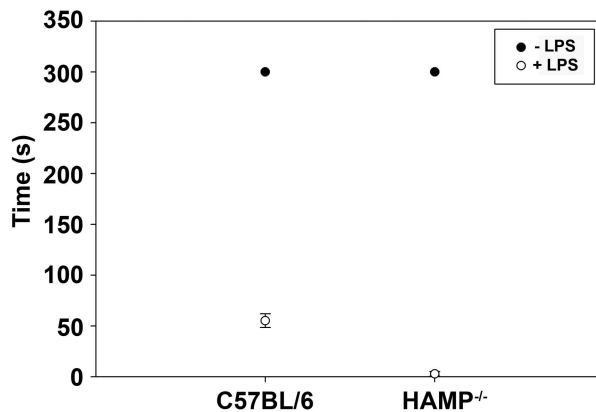



# Supplemental Figure 6

**A**

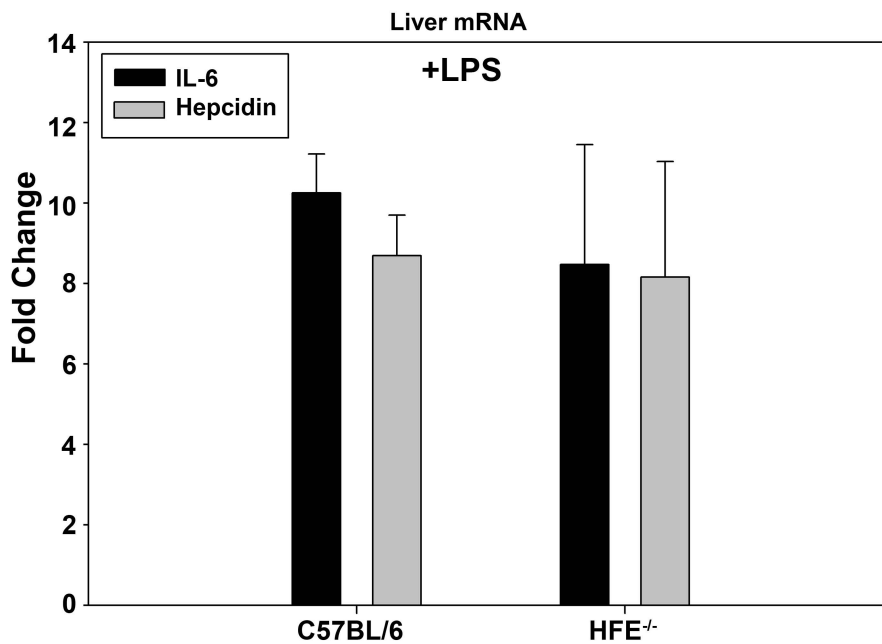

**B**

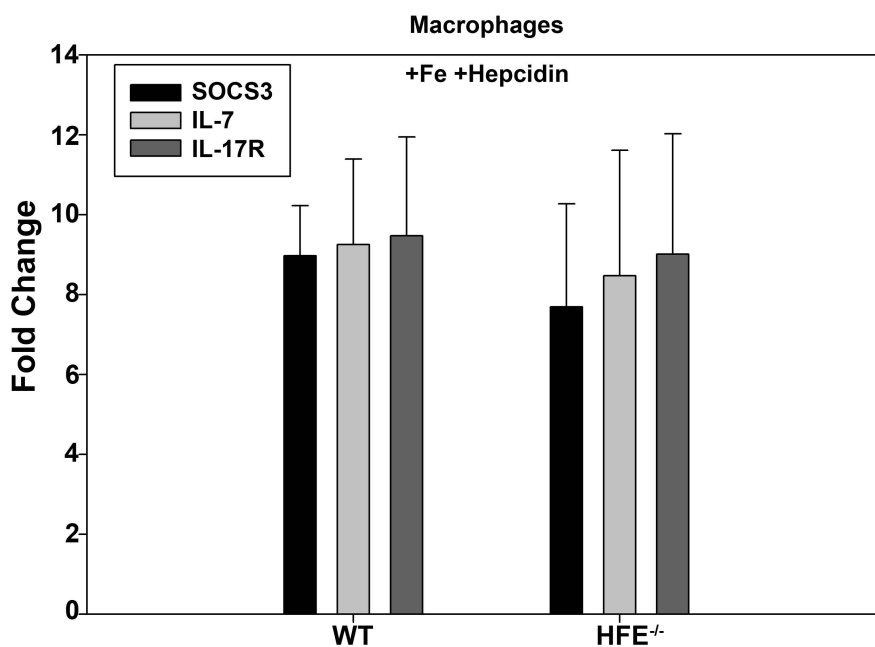

Supplement: sd1 [file 1]
